# Supplementary material for: Inhibition of O-GlcNAc Transferase Alters the Differentiation and Maturation Process of Human Monocyte Derived Dendritic Cells
Source: MDPI journal article supplement (doi:10.3390/cells10123312), 2021-11-26
Supplement: s1 [file s1]

# Inhibition of O-GlcNAc transferase alters the differentiation and maturation process of human monocyte derived dendritic cells

Matjaž Weiss <sup>1</sup>, Marko Anderluh <sup>1</sup> and Martina Gobec <sup>2,\*</sup>

<sup>1</sup> The Department of Pharmaceutical Chemistry, Faculty of Pharmacy, University of Ljubljana, 1000 Ljubljana, Slovenia; matjaz.weiss@ffa.uni-lj.si (M.W.), marko.anderluh@ffa.uni-lj.si (M.A.)

<sup>2</sup> The Department of Clinical Biochemistry, Faculty of Pharmacy, University of Ljubljana, 1000 Ljubljana, Slovenia

\* Correspondence: martina.gobec@ffa.uni-lj.si; Tel.: +386-1-4769-636

## CONTENTS

|                                                                                                                                                        |   |
|--------------------------------------------------------------------------------------------------------------------------------------------------------|---|
| <b>Methods</b> .....                                                                                                                                   | 2 |
| Viability assay.....                                                                                                                                   | 2 |
| <b>Results</b> .....                                                                                                                                   | 2 |
| <b>Figure S1.</b> Viability of moDCs.....                                                                                                              | 2 |
| <b>Figure S2.</b> Characterisation of mTOR/AKT and MEK/ERK signalling pathways in the presence of OSMI-1. ....                                         | 3 |
| <b>Figure S3.</b> Characterisation of specific DC surface markers in the presence of Vitamin D <sub>3</sub> together with IFN- $\gamma$ (toIDCs). .... | 4 |
| <b>Figure S4.</b> Characterisation of specific DC surface markers in the presence of OSMI-1 during maturation. ....                                    | 4 |

## Methods

### *Viability assay*

Viability of moDCs was measured by PI staining (ThermoFischer Scientific). Briefly,  $2 \times 10^5$  treated or untreated moDCs were stained by 2.0  $\mu\text{g/mL}$  of PI for 5 min. Measurements were performed on Attune NxT flow cytometer (ThermoFisher Scientific).

## Results

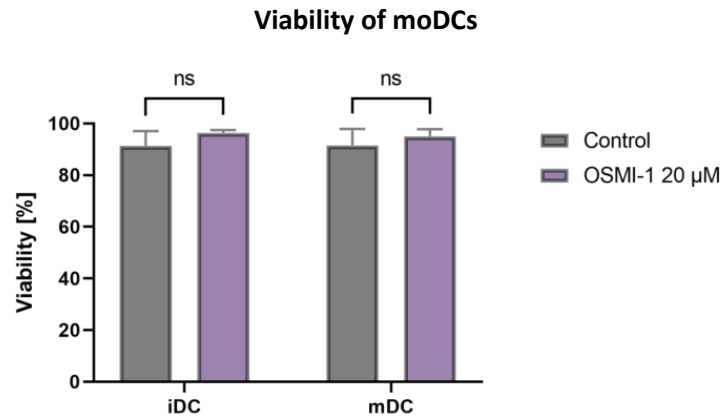

**Figure S1.** *Viability of moDCs.*

Viability of untreated or OSIM-1 treated immature and mature moDCs was assessed by PI. Results are presented as percentage of viable cells (PI negative)  $\pm$  SD (4 different donors). Statistical significance between individual pairs was calculated using Student's t-test; p-value < 0.05 was considered statistically significant. iDCs, immature moDCs; mDCs, mature moDCs.

## OGT inhibitor OSMI-1 affects the MEK/ERK and mTOR/AKT signalling axis in moDCs

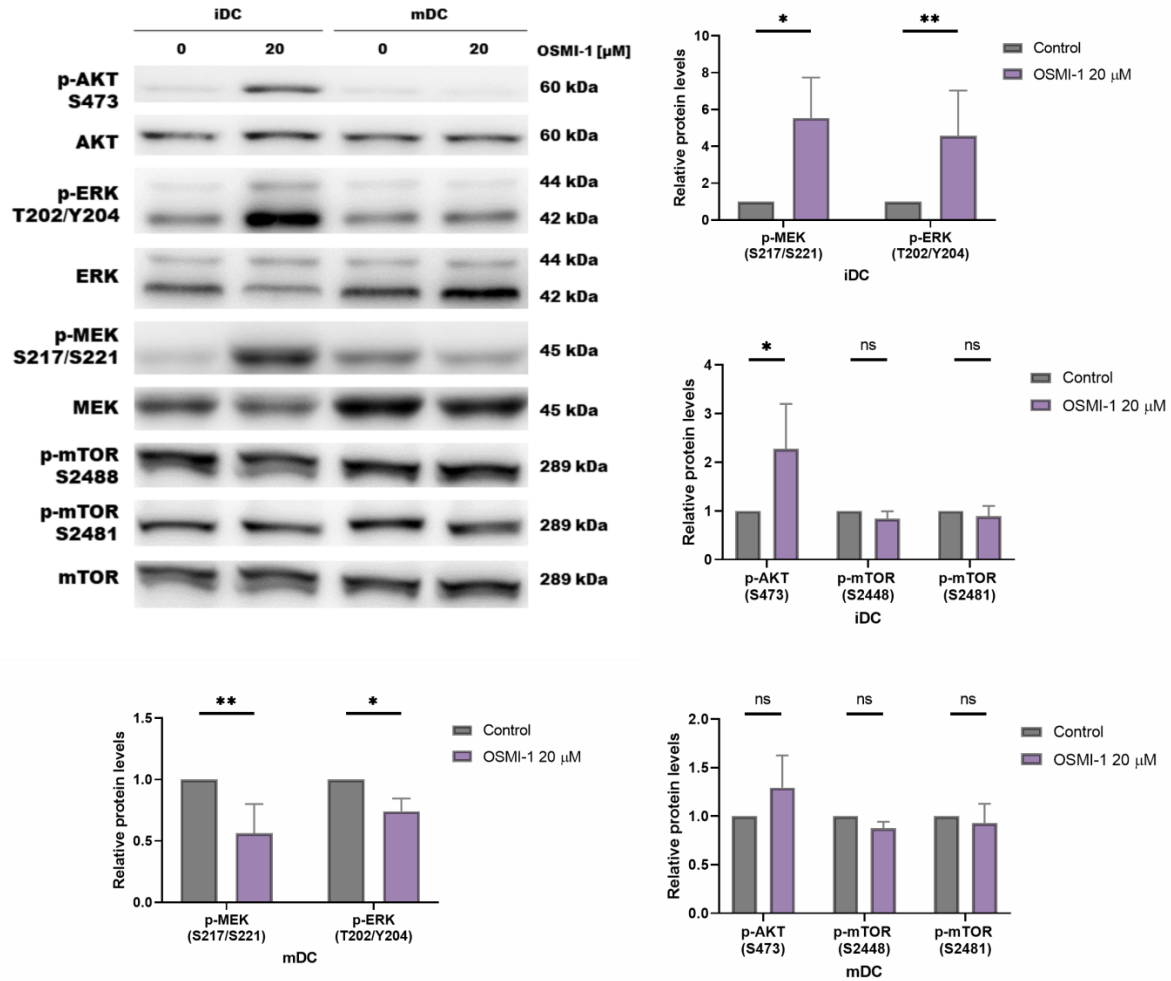

**Figure S2.** Characterisation of mTOR/AKT and MEK/ERK signalling pathways in the presence of OSMI-1.

Representative immunoblots of phosphorylated ERK, MEK, AKT and mTOR, and their total expression in untreated or OSMI-1 treated immature (day 6) and mature moDCs (day 8). The results in charts are presented as a ratio of phosphorylated/total protein levels normalized to untreated moDCs  $\pm$  SD (4-6 different donors). Statistical significance between individual pairs was calculated using Student's t-test; p-value < 0.05 was considered statistically significant. iDCs, immature moDCs; mDCs, mature moDCs.

### Phenotype of tolDCs and mature OSMI-1-moDCs obtained from nontreated immature moDCs

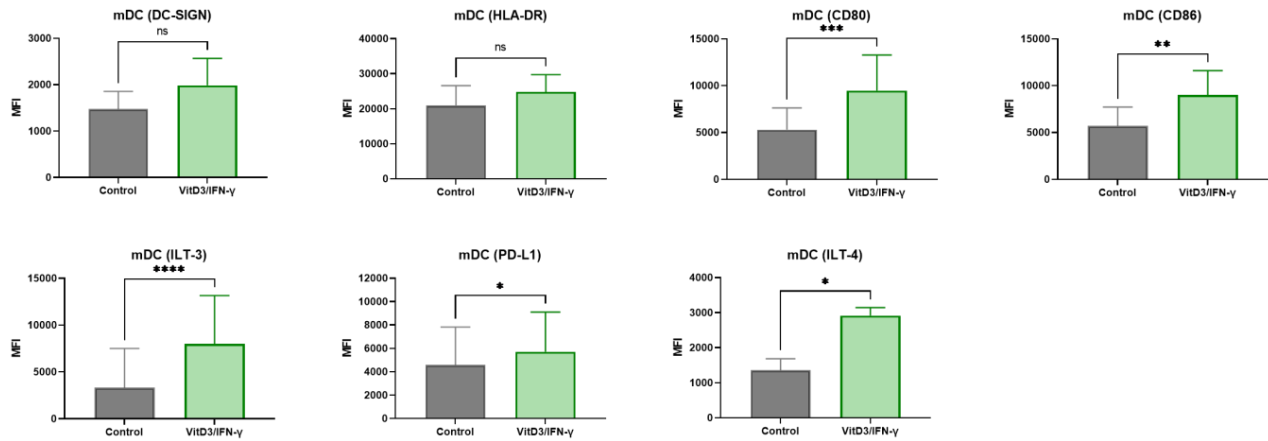

**Figure S3.** Characterisation of specific DC surface markers in the presence of Vitamin D<sub>3</sub> together with IFN- $\gamma$  (tolDCs).

Shown are mean MFI values  $\pm$  SD of n=6-8 independent experiments. tolDC were prepared from immature moDCs following 2 days incubation with the cytokine cocktail and the presence of Vitamin D<sub>3</sub> together with IFN- $\gamma$ . Statistical significance between individual pairs was calculated using Student's t-test; p-value < 0.05 was considered statistically significant. iDCs, immature moDCs; mDCs, mature moDCs.

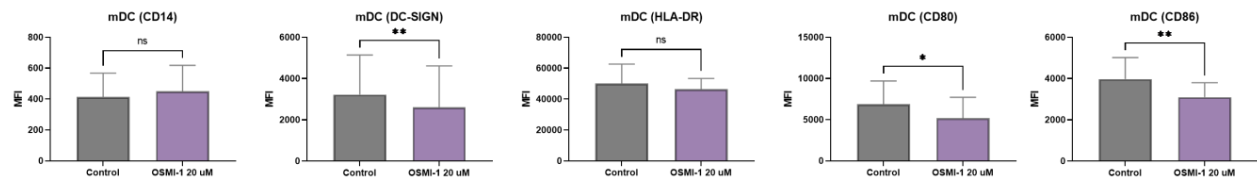

**Figure S4.** Characterisation of specific DC surface markers in the presence of OSMI-1 during maturation.

Shown are mean MFI values  $\pm$  SD of n=6-8 independent experiments. Mature moDCs were prepared from control immature moDCs following 2 days incubation with the cytokine cocktail. The immature moDCs (control) were either untreated or treated with 20  $\mu$ M of OSMI-1 for additional 2 days. Statistical significance between individual pairs was calculated using Student's t-test; p-value < 0.05 was considered statistically significant. iDCs, immature moDCs; mDCs, mature moDCs.
